# Supplementary material for: Cytoskeleton-centric protein transportation by exosomes transforms tumor-favorable macrophages
Source: PubMed Central journal article supplement (PMC5341883; doi:10.18632/oncotarget.11794), 2016-09-01
Supplement: oncotarget-07-67387-s001.pdf [file oncotarget-07-67387-s001.pdf]

## Cytoskeleton-centric protein transportation by exosomes transforms tumor-favorable macrophages

### SUPPLEMENTARY FIGURES AND TABLES

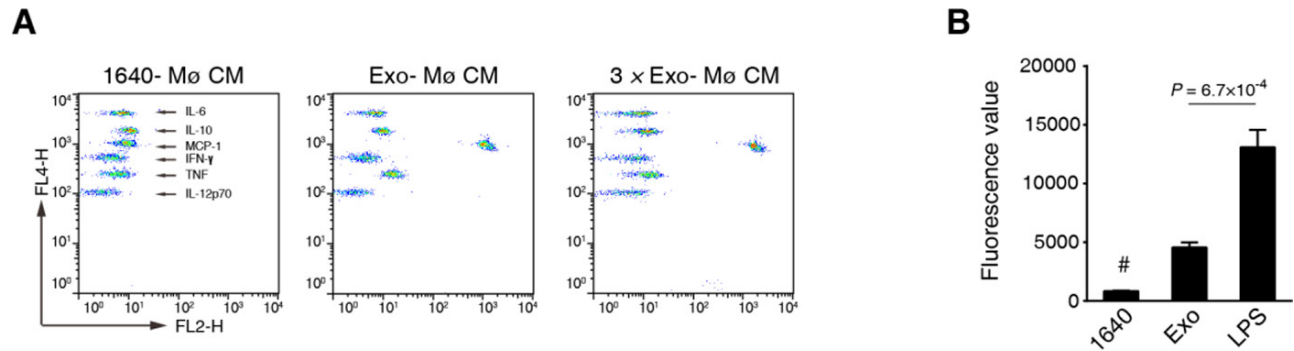

**Supplementary Figure S1: A. Inflammatory phenotype analysis of CT-26 exosome-educated macrophages.** (A) Representative CBA FCM results. **B.** Luciferase reporter gene assay of NF $\kappa$ B in the CT-26 exosome- treated RAW264.7 cells. The LPS-treated group served as a positive control for the NF $\kappa$ B activation.  $\#P < 0.001$ , compared with any of the other groups ( $n=3$ , two-tailed Student's  $t$ -test).

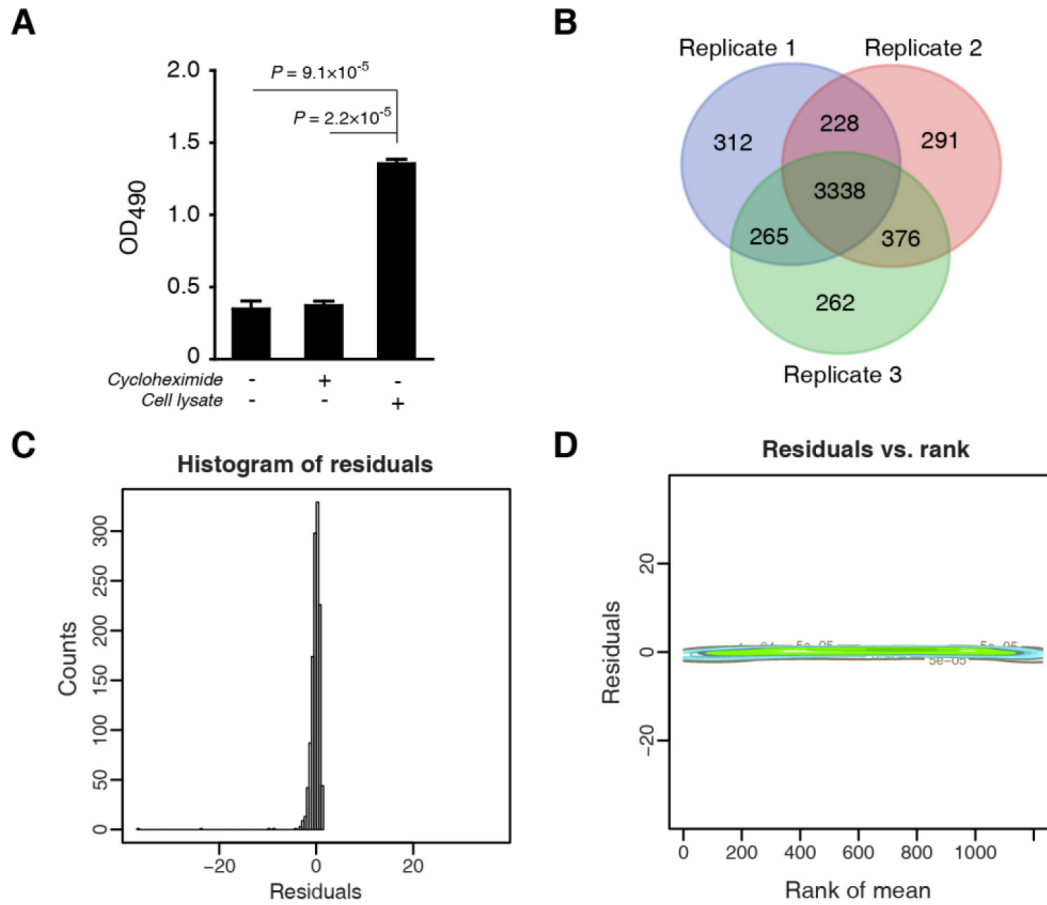

**Supplementary Figure S2: Cytotoxicity assay and proteome analysis of transported proteome.** **A.** Supernatant lactate dehydrogenase activity assay on the cycloheximide-treated BMMs. Two-tailed Student's *t*-test,  $n=3$ . **B.** Venn diagram of the protein identifications in the three CEEM MS analyses. **C, D.** Residual distribution analysis of the endpoint transported proteins in CEEMs with PLGEM.

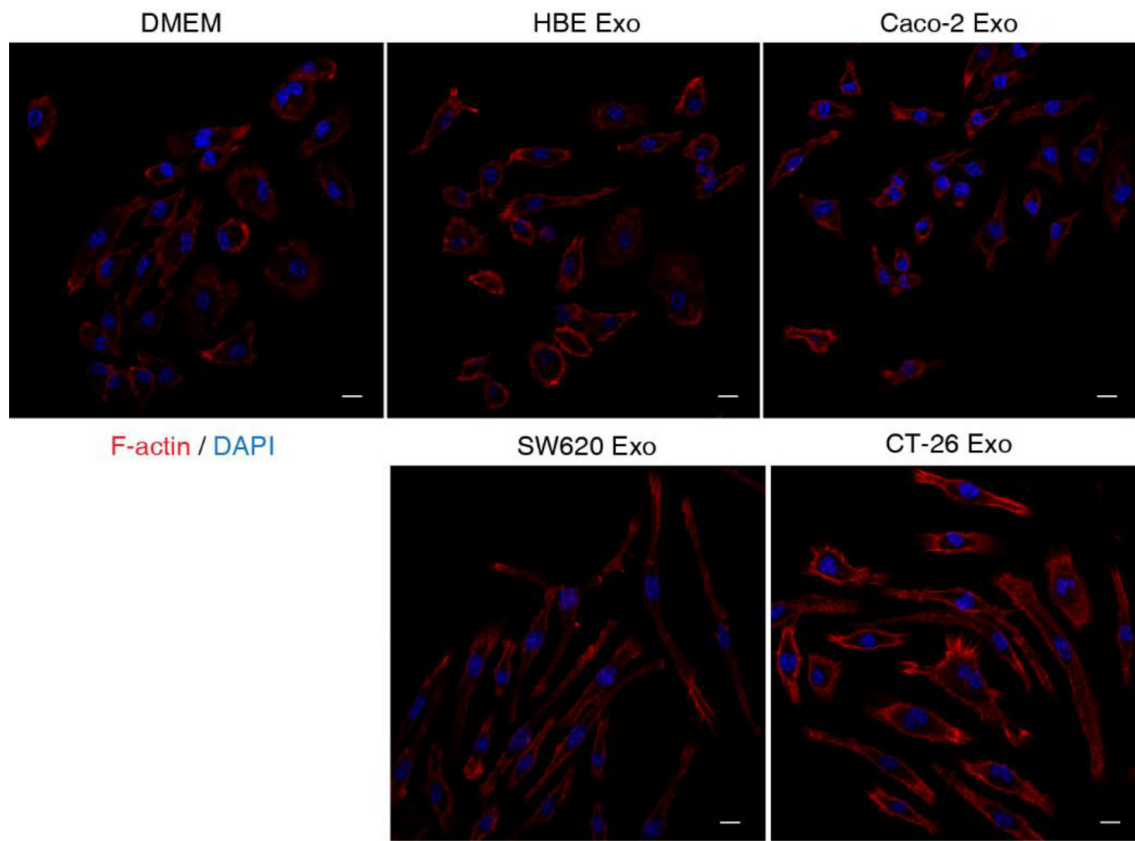

**Supplementary Figure S3: Representative images of macrophages treated by exosomes isolated from cell lines with different EMT statuses.** Images shown are F-actin (Red) and the nuclei (Blue) observed by confocal microscopy. Scale bar = 10  $\mu$ m.

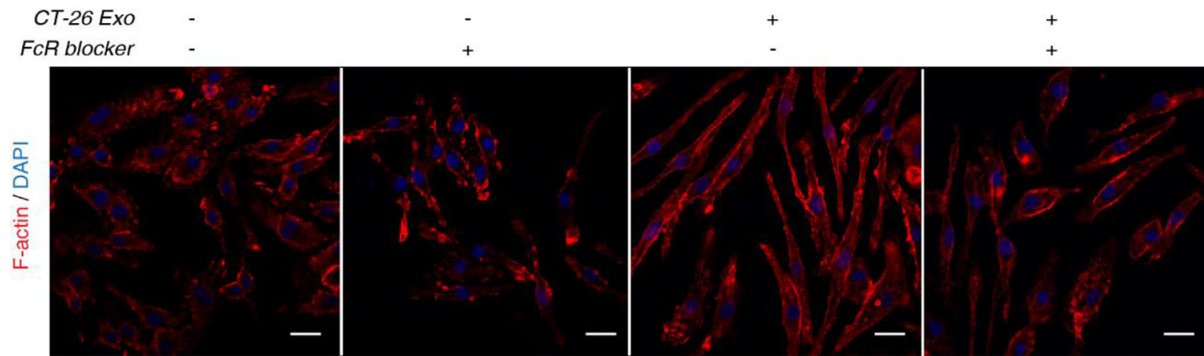

**Supplementary Figure S4: Representative images of macrophages treated by exosomes and/or FcR-blocker.** Images shown are F-actin (Red) and nuclei (Blue) staining by confocal microscopy. Scale bar = 10  $\mu$ m.

**Supplementary Table S1: Overall MS identifications of the endpoint exosomally transported proteome in CEEMs**

See Supplementary File 1

**Supplementary Table S2: Endpoint exosomally transported proteins repeatedly identified across all of the three replicates**

See Supplementary File 2

**Supplementary Table S3: Endpoint exosomally transported proteins with significant reproducibility determined by PLGEM**

See Supplementary File 3

**Supplementary Table S4: Gene ontology terms of the exosomally transported proteome in CEEMs**

See Supplementary File 4

**Supplementary Table S5: (A, B) Gene ontology terms analyzed on Group 1 genes in Supplemental Table. S4. The GO biological process (A) and the molecular function analysis by reactome (B) are shown**

See Supplementary File 5

**Supplementary Table S6: (A, B) Label-free MS identifications of CT26 cells (A) and CT-26 exosomes (B). (C) Comparison of relative protein abundances between CT26 cells and CT-26 exosomes**

See Supplementary File 6

**Supplementary Table S7: Gene ontology analysis of biological process with the exosomally enriched protein**

See Supplementary File 7
